# Supplementary material for: Domain-wide regulation of gene expression in the human genome
Source: HighWire-hosted journal article supplement (doi:10.1101/gr.6276007), 2007-08-10
Supplement: Gierman_Suppl1._Table_S2-S3.pdf [file Gierman_Suppl1._Table_S2-S3.pdf]

**Supplemental Table S2.** Difference in diameter between ridge and anti-ridge domains. Unpaired t-test, assuming unequal variance (two-tailed significance).

| Clone   | Clone 1               | Clone 2               | Clone 3              |
|---------|-----------------------|-----------------------|----------------------|
| Clone 4 | $1.7 \times 10^{-13}$ | $4.3 \times 10^{-22}$ | $7.5 \times 10^{-4}$ |
| Clone 5 | $2.5 \times 10^{-13}$ | $8.6 \times 10^{-21}$ | $9.0 \times 10^{-4}$ |

**Supplemental Table S3.** Difference in nuclear position between ridge and anti-ridge domains. Unpaired t-test, assuming unequal variance (two-tailed significance).

| Clone   | Clone 1               | Clone 2               | Clone 3               |
|---------|-----------------------|-----------------------|-----------------------|
| Clone 4 | $4.7 \times 10^{-10}$ | $5.1 \times 10^{-11}$ | $8.0 \times 10^{-11}$ |
| Clone 5 | $1.1 \times 10^{-16}$ | $5.2 \times 10^{-19}$ | $1.6 \times 10^{-18}$ |
